# Supplementary material for: Evaluating xenograft mouse models for preclinical assessment of adoptive T cell transfer
Source: Research Square preprint supplement (doi:10.21203/rs.3.rs-6528016/v1), 2025-05-30
Supplement: Supplementary file 1 [file 8be52335978a5d363e3d7434.pdf]

# Supplementary Figure S1

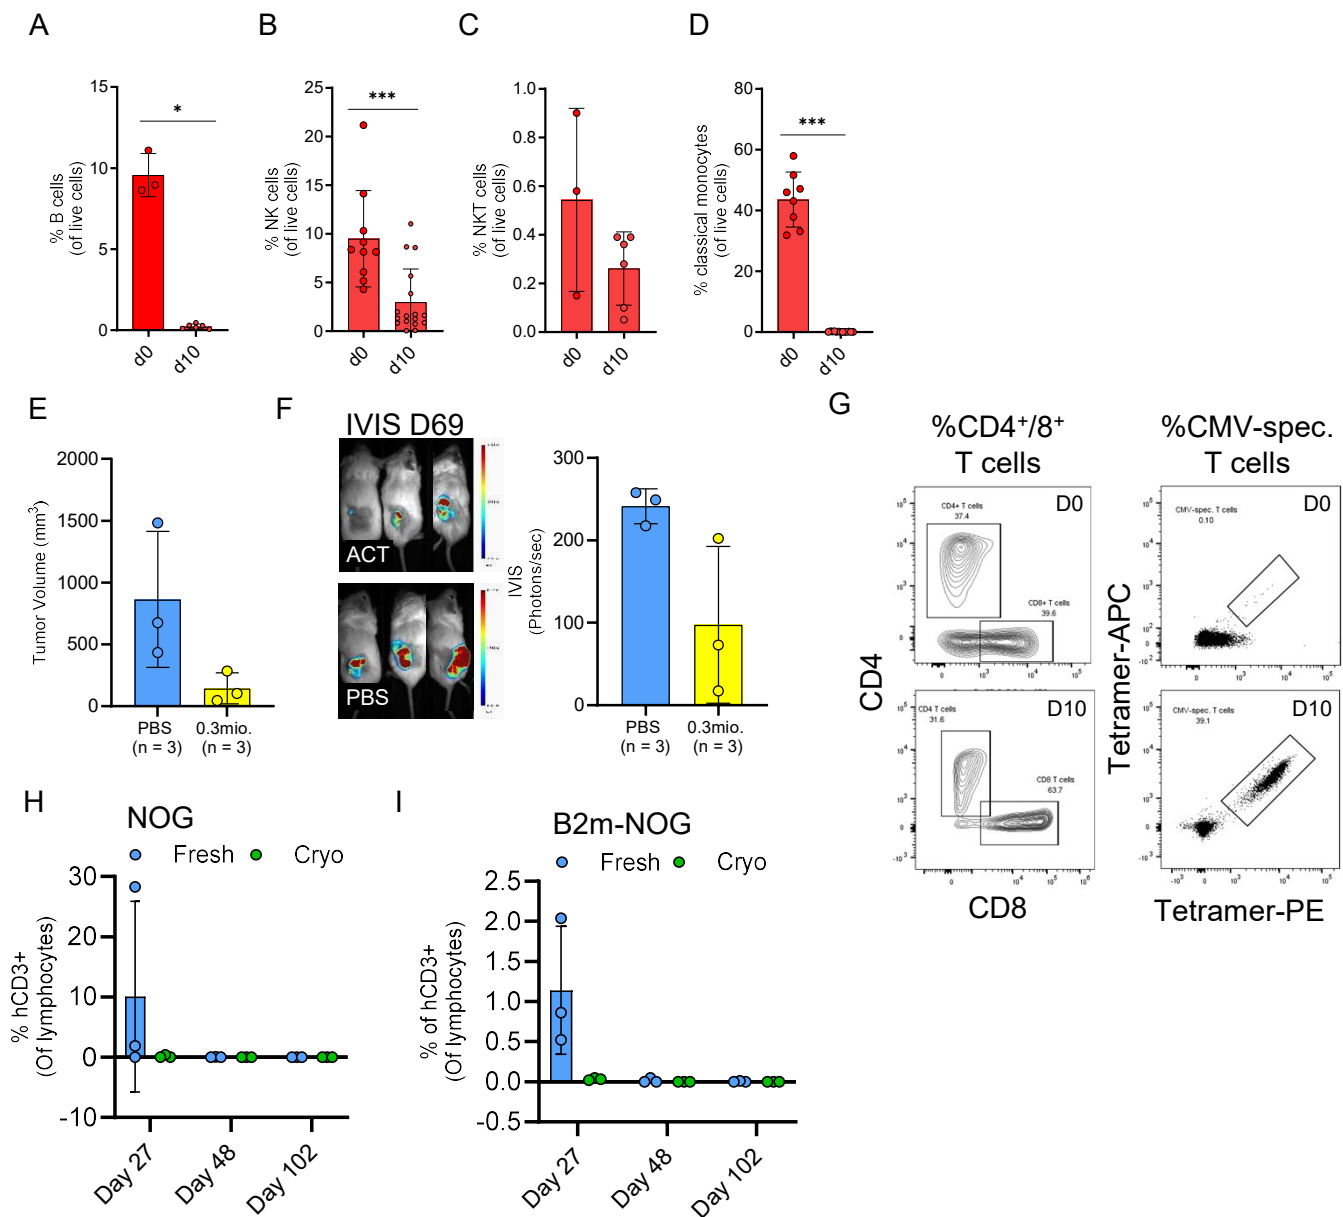

**Suppl. Figure S1 | Ag-scaffold-expanded T cells engraft and cause GvHD in hIL-2-NOG mice in a dose-dependent manner (A to D)** Frequency of (A) B cells, (B) NK cells, (C) NKT cells, and (D) monocytes in the Ag-scaffold-expanded cell product prior to (day 0) and on the day of harvest (day 14). Data are from three to eight individual expansions. \*p<0.05, \*\*\*p<0.001 (Mann-Whitney). (E and F) Tumor growth monitored over time after ACT, measured by (E) caliper measurements and (F) IVIS following i.p administration of luciferin. Graphs depict the mean±SD. (G) Surface expression of CD4<sup>+</sup> and CD8<sup>+</sup> and identification of CMV-specific cells by tetramer-staining, prior to expansion (day 0) and on the day of harvest (day 10) following expansion with Ag-scaffolds. (H and I) Human CD3<sup>+</sup> T cells (hCD3<sup>+</sup>) in blood of (H) NOG or (I) B2m-NOG mice 27, 48 and 102 days, post ACT with (blue) fresh or (green) cryopreserved T cells, respectively.

Supplementary Figure S2

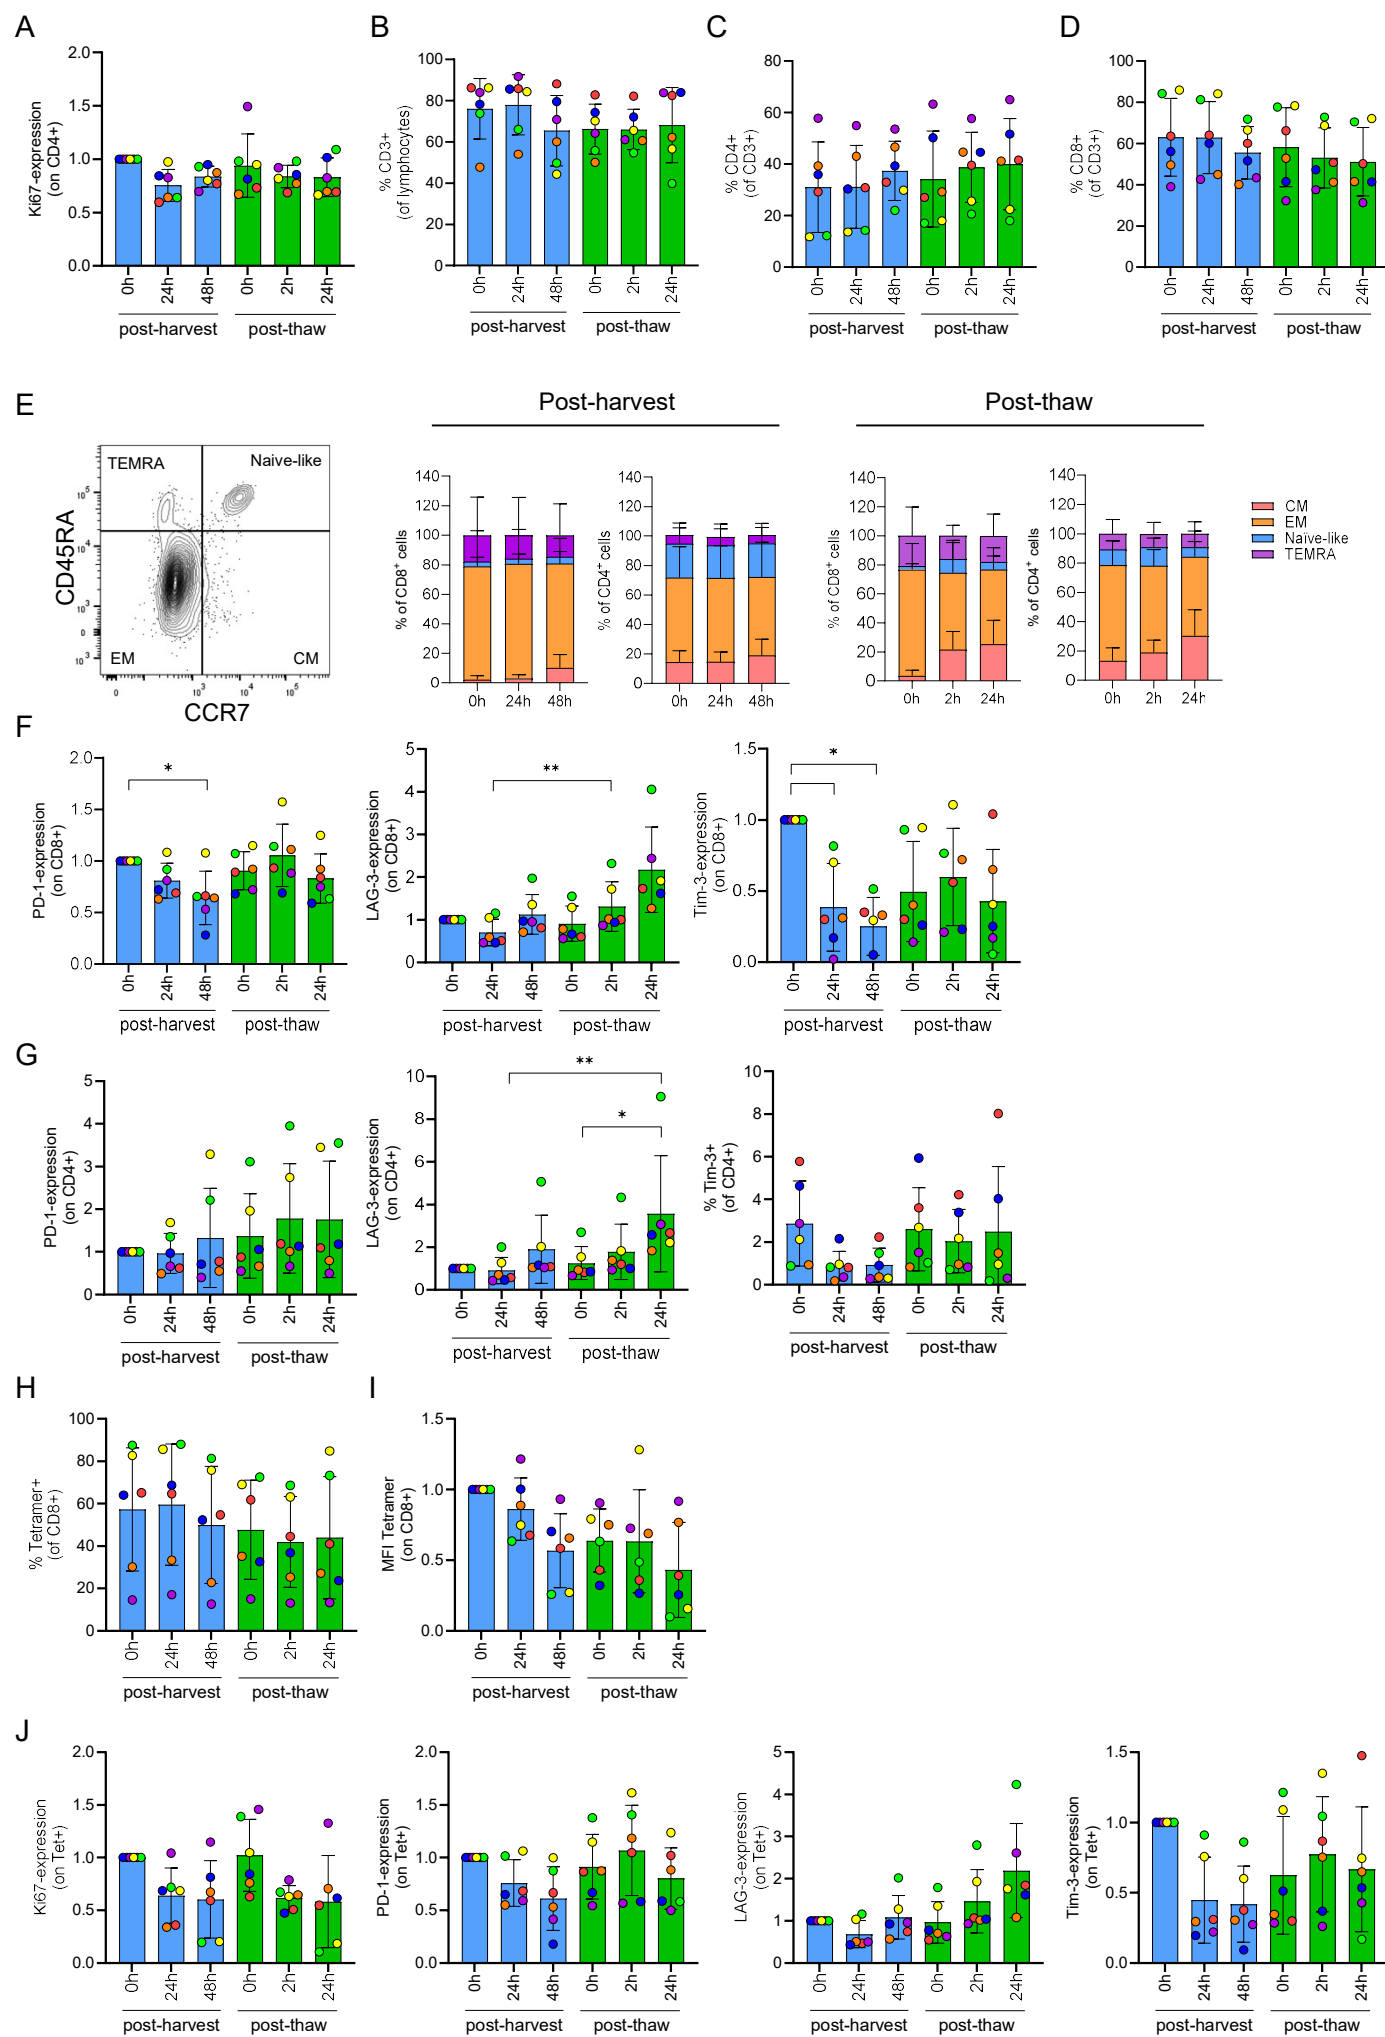

**Suppl. Figure S2 | Phenotypic comparison of cryopreserved and/or rested effector T cells**

Frequency of (A) Ki67<sup>+</sup> CD4<sup>+</sup> T cells, and (B) CD3<sup>+</sup>, (C) CD4<sup>+</sup>, and (D) CD8<sup>+</sup> T cells in the final cell product at various time points and culturing conditions. Data display the mean  $\pm$  SD frequencies of cells. (E) Characterization of the activation status of T cells after culturing under different conditions. The bars depict the mean  $\pm$  SD proportion of naïve-like, central memory (CM), effector memory (EM) and effector memory re-expressing CD45RA (TEMRA) cells out of total CD8<sup>+</sup>/CD4<sup>+</sup> cells. (F and G) Phenotypic assessment of (F) CD8<sup>+</sup> and (G) CD4<sup>+</sup> T cells after culturing under different conditions. Data are the mean  $\pm$  SD of the mean fluorescence intensity of each marker after normalization to the '0h post-harvest'-sample, or the proportion of marker-positive cells (CD4<sup>+</sup> cells, Tim-3). (H and I) Quantification of the (H) frequency and (I) mean fluorescent intensity of tetramer<sub>+</sub> antigen-specific cells in the cell product after culture under different conditions. (J) Phenotypic assessment of tetramer<sup>+</sup> antigen-specific cells after culturing under different conditions. Data are the mean  $\pm$  SD of the mean fluorescence intensity of each marker after normalization to the '0h post-harvest'-sample. Each point represent one PBMC sample, analysed across two to three individual experiments. (n=4-6).

# Supplementary Figure S3

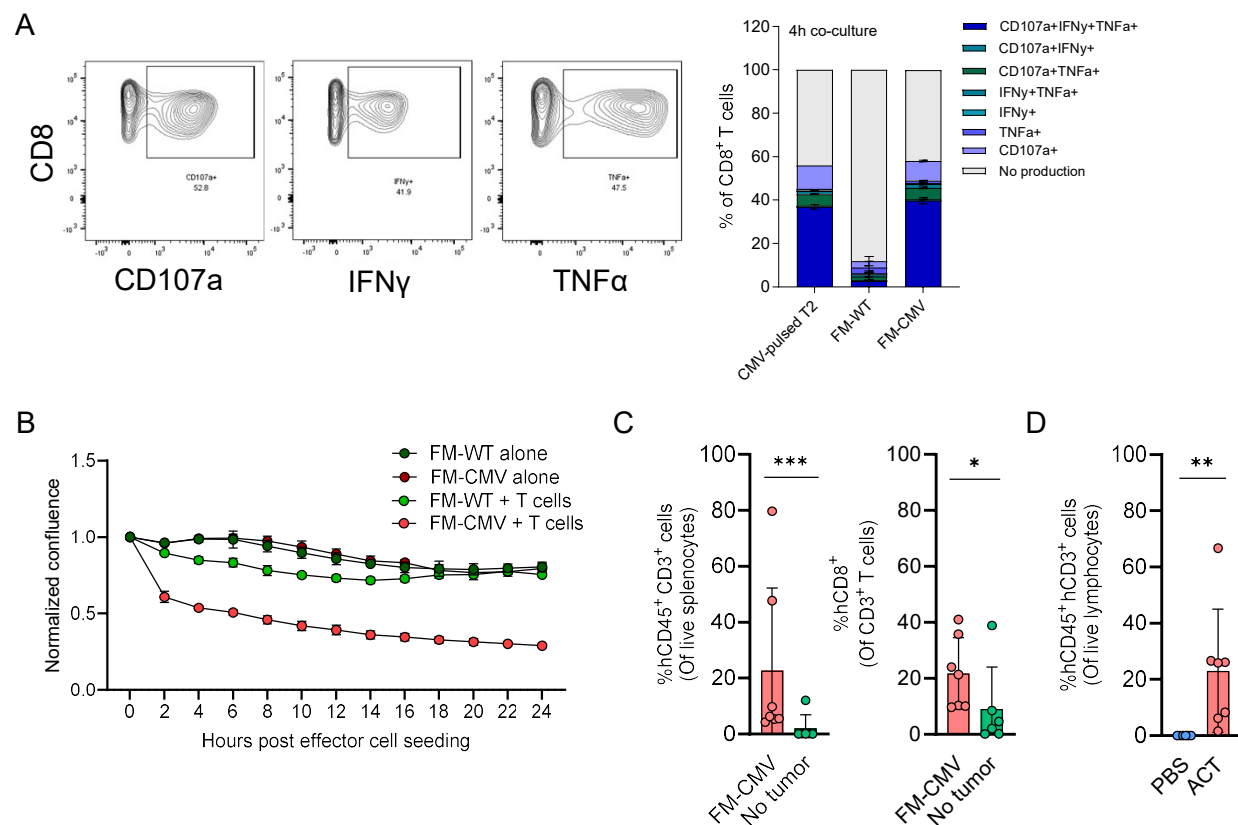

**Suppl. Figure S3 | *In vitro* assessment of CMV-specific T cell functionality** **(A)** Functional assessment by intracellular cytokine (IFN $\gamma$  and TNF $\alpha$ ) production and degranulation (surface CD107a) following co-culture of Ag-scaffold-expanded CMV-specific T cells with FM-CMV, FM-WT or T2 target cells loaded with the relevant antigenic peptide. Bars display the mean  $\pm$  SD frequency of cytokine-producing cells. **(B)** Tumor target killing following co-culture of Ag-scaffold-expanded CMV-specific T cells with FM-CMV, FM-WT or T2 target cells. Graph depicts the tumor target confluency at various time points, with or without addition of effector T cells normalized to the confluency upon addition of T cells. **(C and D)** Frequency of **(C)** hCD45<sup>+</sup> CD3<sup>+</sup> and CD8<sup>+</sup> T cells in the spleen or **(D)** hCD45<sup>+</sup> CD3<sup>+</sup> T cells in the tumor, at the end of the experiment. Bars depict the mean  $\pm$  SD. \* $p$ <0.05, \*\* $p$ <0.01, \*\*\* $p$ <0.001 (Mann-Whitney)

Supplementary Table S1

| <b>Marker</b>                          | <b>Conjugate</b> | <b>Clone</b> | <b>Vendor</b> | <b>Cat no</b>     |
|----------------------------------------|------------------|--------------|---------------|-------------------|
| CD3                                    | FITC             | SK7          | BD            | 345764            |
| CD3                                    | BUV737           | SK7          | BD            | 612752            |
| CD3                                    | BV786            | SK7          | BD            | 563800            |
| CD8a                                   | BV480            | RPA-T8       | BD            | 566121            |
| CD8b                                   | BV421            | 2ST8.5H7     | BD            | 568373            |
| CD4                                    | BV650            | SK3          | BD            | 563875            |
| CD4                                    | PE-Cy7           | RPA-T4       | BD            | 560649            |
| hCD45                                  | BV711            | HI30         | BD            | 564357            |
| mCD45                                  | BUV395           | 30F11        | BD            | 567249            |
| CD45RA                                 | BV711            | HI100        | BD            | 563733            |
| CCR7                                   | APC              | G043H7       | Biolegend     | 353214            |
| Ki67                                   | BV786            | B56          | BD            | 564071            |
| LAG3                                   | FITC             | 17B4         | Adipogen      | AG-20B-0012F-C100 |
| Tim3                                   | PE-Cy7           | F38-2E2      | Biolegend     | 345014            |
| PD-1                                   | BV421            | EH12.1       | BD            | 565024            |
| CD19                                   | FITC             | 4G7          | BD            | 345776            |
| CD16                                   | APC              | 3G8          | Biolegend     | 302012            |
| CD14                                   | BV480            | MO-P9        | BD            | 566141            |
| CD56                                   | BUV737           | NCAM16.2     | BD            | 612766            |
| CD1d-alpha-galactosylceramide multimer | PE               |              | TetramerShop  | HCD1D-001         |
| pan-TCRgd                              | BV650            | B1           | BD            | 564156            |
| CD107a                                 | PE               | H4A3         | BD            | 555801            |
| TNF                                    | PE-Cy7           | MAb11        | Biolegend     | 502930            |
| IFNg                                   | APC              | B27          | BD            | 554702            |
| Streptavidin                           | PE               |              | Biolegend     | 405204            |
| Streptavidin                           | APC              |              | Biolegend     | 405243            |
